# 1 The role of surface adhesion on the 2 macroscopic wrinkling of biofilms

3 Steffen Geisel<sup>1,2</sup>, Eleonora Secchi<sup>2,3\*</sup>, Jan Vermant<sup>1\*</sup>

\*For correspondence:

[jan.vermant@mat.ethz.ch](mailto:jan.vermant@mat.ethz.ch) (1);  
[secchi@ifu.baug.ethz.ch](mailto:secchi@ifu.baug.ethz.ch) (3)

4 <sup>1</sup>Laboratory for Soft Materials, Department of Materials, ETH Zurich, Switzerland;  
5 <sup>2</sup>Stockerlab, ETH Zurich, Switzerland; <sup>3</sup>Biomatter Microfluidics Group, ETH Zurich,  
6 Switzerland

---

8 **Abstract** Biofilms, bacterial communities of cells encased by a self-produced matrix, exhibit a  
9 variety of three-dimensional structures. Specifically, channel networks formed within the bulk of  
10 the biofilm have been identified to play an important role in the colonies viability by promoting the  
11 transport of nutrients and chemicals. Here, we study channel formation and focus on the role of  
12 the adhesion of the biofilm matrix to the substrate in *Pseudomonas aeruginosa* biofilms grown  
13 under constant flow in microfluidic channels. We perform phase contrast and confocal laser  
14 scanning microscopy to examine the development of the biofilm structure as a function of the  
15 substrates surface energy. The formation of the wrinkles and folds is triggered by a mechanical  
16 buckling instability, controlled by biofilm growth rate and the film's adhesion to the substrate. The  
17 three-dimensional folding gives rise to hollow channels that rapidly increase the overall volume  
18 occupied by the biofilm and facilitate bacterial movement inside them. The experiments and  
19 analysis on mechanical instabilities for the relevant case of a bacterial biofilm grown during flow  
20 enable us to predict and control the biofilm morphology.

---

## 22 Introduction

23 Bacteria predominantly exist in biofilms, surface-attached aggregates of cells (*Nadell et al., 2017*;  
24 *Flemming et al., 2016*; *Flemming and Wuertz, 2019*). In biofilms, the cells are enclosed in autopro-  
25 duced, strongly hydrated extracellular polymeric substances (EPS), which form the extracellular  
26 matrix. EPS consist of polysaccharides, the most abundant component, proteins, nucleic acids,  
27 and lipids (*Lasa, 2006*; *Frolund et al., 1996*; *Flemming and Wingender, 2010*). The matrix plays  
28 different roles: its viscoelastic nature provides mechanical stability to the biofilm, while its physical  
29 chemistry is responsible for the adhesion to the surface and internal cohesion (*Costerton et al.,*  
30 *1987*; *Hall-Stoodley et al., 2004*). Additionally, not only mechanical and chemical, but also the  
31 structural properties of the matrix contribute to the exceptional viability of the bacterial community  
32 in the biofilm lifestyle (*Epstein et al., 2011*; *Okegbe et al., 2014*; *Madsen et al., 2015*). However, the  
33 mechanistic understanding of how environmental conditions and the characteristics of the surfaces  
34 on which they grow affect the biofilm structure is still limited.

35 Bacterial biofilms are found in a vast range of environments and applications, ranging from  
36 bioremediation (*Ghosh et al., 2019*) to biomedical (*Badal et al., 2020*; *Bixler and Bhushan, 2012*)  
37 and industrial fouling (*Schultz et al., 2011*). In most settings, the biofilm forms on a solid surface  
38 while being exposed to fluid flow. Hydrodynamic conditions control mass transfer, which in turn  
39 controls the transport of nutrients, metabolic products and signal molecules (*Purevdorj et al.,*  
40 *2002*; *Krsmanovic et al., 2021*; *Conrad and Poling-Skutvik, 2018*). Fluid flow also exerts drag forces  
41 on the biofilm and shapes its structure (*Stoodley et al., 1999a,b*). Under strong flows, bacteria  
42 often form biofilm streamers in the shape of long, filamentous structures, while under weak

43 flow conditions, some bacteria form surface attached colonies with ripple-like structures (*Rusconi*  
44 *et al.*, 2011; *Purevdorj et al.*, 2002). However, it is unclear what mechanisms govern the structure  
45 evolution under flow, which is most often present. Therefore, understanding biofilm morphogenesis  
46 under hydrodynamically relevant conditions is of crucial importance both from the biological and  
47 engineering standpoint.

48 Some biofilms exhibit three-dimensional morphologies characterized by the presence of folds  
49 and wrinkles that have been proposed to improve the viability of the biofilm due to improved  
50 uptake and transport of oxygen and nutrients (*Wilking et al.*, 2013; *Kempes et al.*, 2014). However,  
51 many experimental studies focused on static biofilm-agar systems to characterize the mechanical  
52 contributions to the formation of these 3D structures (*Asally et al.*, 2012; *Yan et al.*, 2019). From  
53 the physical standpoint, a biofilm grown on agar is a complex system as biological and mechan-  
54 ical contributions are tightly interconnected. Additionally, it may not be as relevant for biofilms  
55 occurring in industrial or natural environments where fluid flow and solid substrates are often  
56 present. Biofilms grown on agar are characterized by substantial heterogeneity in nutrient avail-  
57 ability, created by the diffusive nature of transport, which leads to differences in growth rates and  
58 subsequent mechanical stresses across the biofilm (*Stewart, 2003; Wilking et al.*, 2011). Theoretical  
59 and experimental studies found that this anisotropic growth may be the driving force for folding in  
60 colonies with moderate adhesion to the substrates (*Ben Amar and Wu, 2014; Espeso et al.*, 2015;  
61 *Fei et al.*, 2020). Additionally, the biofilm colony can spread across the agar plate as the biofilm is  
62 spatially unconfined (*Verstraeten et al.*, 2008; *Seminara et al.*, 2012). Growth gradients and colony  
63 spreading are poorly understood processes that involve both biological as well as mechanical  
64 effects and hence make biofilm on agar a complex system to investigate (*Zhang et al.*, 2016b;  
65 *Fauvart et al.*, 2012). Studies under well-controlled conditions, designed to deconvolute mechanical  
66 contributions from biological responses of the microorganisms, are needed to understand the  
67 mechanical contributions to folding and wrinkling of biofilms.

68 Mechanical contributions to the formation of three-dimensional morphologies are well under-  
69 stood in several eukaryotic systems, including ripple-shaped leaves or the fingerprints of humans.  
70 Often these structures are developed due to bonded layers of biomaterial and cells that grow at  
71 different rates (*Liang and Mahadevana, 2011; Kücken and Newell, 2004*). Similar mechanical mor-  
72 phologies have been investigated in thin film mechanics, when elastic films are attached to a stiff  
73 substrate and compressive stresses are induced chemically or thermally (*Hutchinson et al.*, 1992;  
74 *Chung et al.*, 2011). Common characteristics of these biological and artificial examples are adhesion  
75 between the layers and a mechanical strain mismatch. The consequently induced compressive  
76 stress leads to a variety of morphologies such as wrinkles, folds, or delaminated blisters (*Wang and*  
77 *Zhao, 2015*). Although the structures found in bacterial biofilms show many qualitative similarities,  
78 only recently the links between folds in biofilms and mechanical instabilities have been investigated.  
79 Recent studies found that the adhesive strength and friction between biofilm and substrate might  
80 play a role in virulence as well as the structural evolution of the biofilm (*Fei et al.*, 2020; *Cont et al.*,  
81 2020). However, many experimental studies use agar as a substrate where adhesion appears  
82 to be spatially and temporally heterogeneous (*Gingichashvili et al.*, 2021). Therefore, systematic  
83 investigations of the interplay between adhesive strength and the formation of folds are needed to  
84 understand better the mechanical instabilities that govern biofilm morphology.

85 In this work, we report on the structural evolution of confined biofilms grown under well-  
86 controlled flow conditions. We investigated the basic mechanism of biofilm folding and wrinkling  
87 under well-defined conditions relevant to environmental, industrial, and medical settings. We show  
88 for the first time how wrinkling of a *P. aeruginosa* PAO1 biofilm creates hollow channels that are  
89 occupied by motile bacteria. Our results indicate that for a laterally confined biofilm, growth on a  
90 solid substrate induces compressive stresses that are the key driving force for buckling-delamination  
91 that governs the formation of channel networks. The process of buckling-delamination is expected  
92 to depend on the material properties of the biofilm, growth-induced compressive stresses, and  
93 the adhesive strength between the biofilm and the solid substrate. Experimentally, we are readily

94 able to control the biofilm adhesion to the substrate. Consequently, the biofilm morphology can be  
95 spatially controlled and patterned, giving unprecedented control over the macroscale structure and  
96 the average thickness of the biofilm.

## 97 Results

### 98 Wrinkle formation at the solid-liquid interface

99 *P. aeruginosa* biofilms grown on a solid surface are exposed to controlled flow in a microfluidic  
100 device. They form wrinkles that span the entire biofilm. The microfluidic device consists of a simple  
101 rectangular channel, made out of polydimethylsiloxane (PDMS) bonded onto a glass slide and  
102 mounted onto an inverted microscope. The channel is 500  $\mu\text{m}$  wide, 100  $\mu\text{m}$  high and 1.5 cm long  
103 (**Figure 1a**). The microfluidic channel was filled with a PAO1 bacterial suspension at  $OD_{600} = 0.2$  and  
104 left at rest for one hour before the flow of fresh culture medium was started. We use a syringe  
105 pump to control the flow of the nutrient solution at an average flow speed of 1.7  $\text{mm s}^{-1}$ . Bacterial  
106 cells exposed to the flow of nutrients grow as a uniform layer of increasing thickness. No significant  
107 biofilm formation is observed on the glass within the timeframe of our experiments. As the biofilm  
108 grown on the PDMS reaches a thickness of 10  $\mu\text{m}$  to 20  $\mu\text{m}$  after 48 to 72 hours, the biofilm develops a  
109 pattern of folds and wrinkles (**Figure 1-video 1**). The pattern is qualitatively similar to the structures  
110 observed in previous studies, where the biofilm was grown under static conditions on agar plates  
111 (**Kempes et al., 2014; Yan et al., 2019**). The initial wrinkle formation starts with small wrinkles that  
112 start to appear throughout the biofilm and are visible in the phase-contrast images of **Figure 1b**  
113 panel II. The wrinkles have an ellipsoidal shape and are typically 30  $\mu\text{m}$  in length and 10  $\mu\text{m}$  in width  
114 when they can first be identified. The wrinkles evolve over several hours into an interconnected  
115 pattern which is visible as dark lines in the phase-contrast time-lapse images of **Figure 1b**. In the  
116 final stage of their development, the individual wrinkles have a width of 20  $\mu\text{m}$  to 30  $\mu\text{m}$  and the  
117 connected network spans the whole biofilm.

118 The temporal evolution of the structure can be divided into three distinct stages. We define  
119 the stages by quantifying the number of individual isolated wrinkles  $N$  and the length of the  
120 longest connected wrinkle  $L$ . The low magnification phase-contrast images were binarized and  
121 subsequently skeletonized (for details, see **Skeletonization of channel networks**) to extract the  
122 desired parameters, namely number of isolated wrinkles  $N$  and the length of the longest wrinkle  
123  $L$  (**Figure 1b, c**). The first stage starts shortly before the first wrinkles appear, which is 49 hours  
124 after the start of the nutrient flow, and lasts 6.5 hours. The first stage is characterized by a  
125 substantial increase in the number of isolated wrinkles, while the length of the longest wrinkle  
126 remains small ( $L < 0.65 \text{ mm}$ ). In the optical observation, at this stage many small and isolated  
127 wrinkles develop evenly throughout the biofilm. In the second phase, which lasts approximately 3.5  
128 hours, the number of isolated wrinkles decreases because they start to merge and form longer,  
129 interconnected paths. This results in a few remaining wrinkles with a considerable length in the  
130 order of 8 mm that form a highly connected network throughout the biofilm. In the third phase, the  
131 biofilm structure reaches a steady state where the longest wrinkle does not grow in length anymore  
132 and the number of unconnected wrinkles stays consistently on a low level. This final stage has been  
133 observed to last at least 5 hours, while the whole process of biofilm wrinkling proceeds over 9 to 10  
134 hours once the first wrinkles appear and until steady state is reached.

### 135 Wrinkles create three-dimensional channels

136 Detailed imaging of fluorescently labeled biofilm with confocal laser scanning microscopy reveals  
137 the three-dimensional topology of the wrinkles. We stain the polysaccharide component of the  
138 biofilm matrix with GFP-fluorescent Concanavalin A and use confocal microscopy to image biofilm  
139 wrinkles in the x-y-plane at different distances from the PDMS substrate (**Figure 2a**). The first image  
140 shows the very top of a wrinkle, 39  $\mu\text{m}$  away from the PDMS. As we move closer to the base of the  
141 biofilm, the extent of the network becomes visible, with connected wrinkles reaching across the

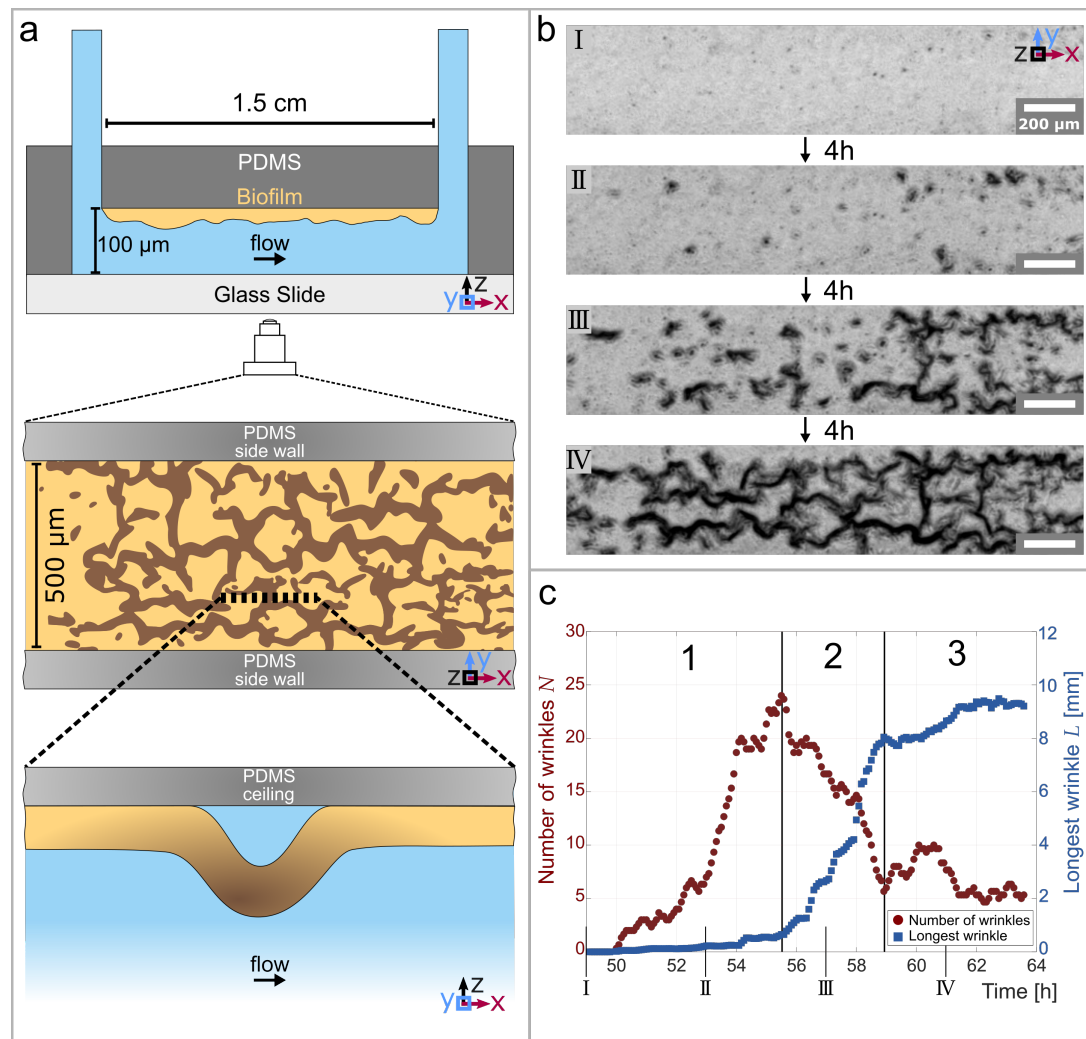

**Figure 1.** Temporal and structural evolution of wrinkles in *P. aeruginosa* PAO1 biofilms grown in flow. **(a)** Schematic representations of the microfluidic device, the wrinkle network in the biofilm and a side view of a single wrinkle. **(b)** Time evolution of the wrinkled structure in the biofilm. Images were taken in phase contrast. **(c)** Number of individual wrinkles,  $N$  (red) and the length of the longest connected wrinkle  $L$  (in mm, blue). The evolution of the wrinkled biofilm can be divided into three distinct stages. Many small, isolated wrinkles appear in the first stage. The wrinkles connect to form a network in the second stage. In the third stage, the biofilm has reached a steady state.

**Figure 1-video 1.** Timelapse video of the wrinkle formation from a flat biofilm to the completely developed wrinkle network. The video shows the biofilm development over 15 hours.



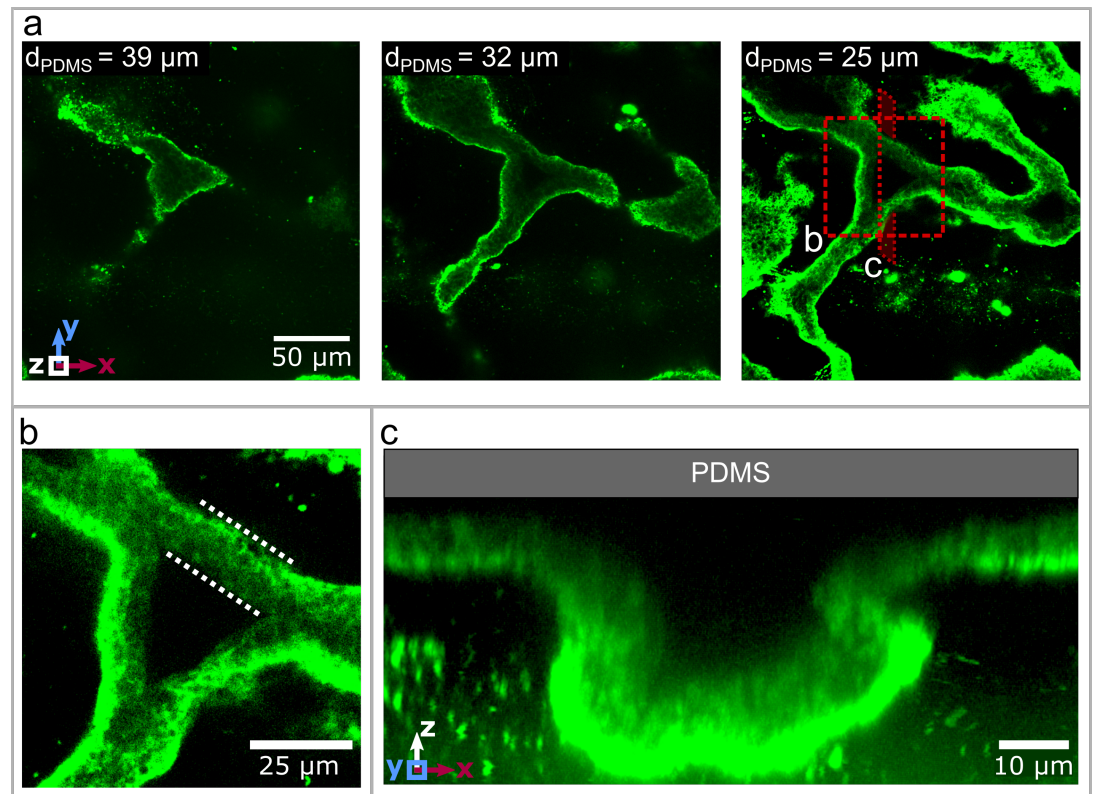

**Figure 2.** Three dimensional structure of the biofilm wrinkles. **(a)** Laser-scanning confocal microscopy images of a biofilm that developed a channel network, stained with a GFP-labelled Concanavalin A lectin stain. The three images show slices in the x-y-plane, starting 39  $\mu\text{m}$  away from the PDMS surface. The second image is taken 32  $\mu\text{m}$  and the third image 25  $\mu\text{m}$  away from the PDMS substrate. **(b)** Close up of the biofilm channel shown in panel (a). The white, dotted lines indicate the walls of the biofilm channel. **(c)** Cross-section and close up of a channel along the cutting plane indicated in panel (a).

142 whole field of view of 200  $\mu\text{m}$ . To visualise the topography of the biofilm, consider a simple piece of  
143 fabric on a solid substrate. If the fabric gets pushed together, it locally separates from the substrate  
144 to form a three-dimensional pattern with folds and wrinkles that resemble the biofilm.

145 The analogy of a wrinkled fabric can be extended to the internal structure of the biofilm wrinkles.  
146 The wrinkles consist of hollow channels that detach from the substrate during their formation. A  
147 close-up image of a wrinkle 25  $\mu\text{m}$  away from the PDMS (**Figure 2b**) allows us to define the walls of  
148 the wrinkle, which are rich in biofilm matrix according to the strong fluorescent signal. In contrast,  
149 the center of the wrinkle does not show a fluorescent signal and is therefore devoid of any biofilm  
150 matrix. This result demonstrates that the wrinkles create hollow channels with walls made out of  
151 biofilm matrix and in the remaining course of this paper we will refer to this as a channel network.  
152 In order to form a channel network, the biofilm locally needs to detach and buckle away from the  
153 substrate. A vertical slice through a confocal volume along the x-z-plane (**Figure 2c**) shows that the  
154 channel height is substantially greater than the thickness of the original biofilm layer. Furthermore,  
155 no biofilm matrix was detected on the PDMS substrate at the location of the channel. This indicates  
156 that the biofilm fully detaches from the substrate, similar to our analogy where the fabric separates  
157 from the substrate to form a pattern of wrinkles and folds. This delamination between the biofilm  
158 and the PDMS substrate allows us to identify buckling-delamination as the underlying mechanism  
159 driving the formation of a channel network throughout the biofilm.

## 160 **Buckling-Delamination as the driving force for channel formation**

161 The growth of the biofilm in a confined environment acts as the driving force for the buckling  
162 instability, which leads to the formation of the channel network. In our experiments, we control the  
163 nutrient availability - and therefore the growth rate of the biofilm - in a biofilm on a solid, planar  
164 surface. As reported in **Figure 3a**, a biofilm is first grown under standard experimental conditions  
165 with a constant flow of nutrients. Seven hours after the appearance of the first channels, the  
166 nutrient solution is replaced with a salt solution of equal salinity but devoid of any nutrients. After  
167 18 hours without any nutrient supply, the salt solution is replaced again with the nutrient-rich  
168 solution the biofilm was initially grown in and supplied nutrients for additional 24 hours. The  
169 evolution of the number of isolated channels,  $N$ , as a function of time and nutrient availability  
170 (**Figure 3a**) demonstrates that the steep increase in  $N$  is abruptly interrupted when the biofilm is no  
171 longer supplied with nutrients. An increase or changes in  $N$  only occur when nutrients are present.  
172 The channel formation restarts as the nutrient solution is reintroduced in the microfluidic channel  
173 and continues as shown in **Figure 1c**. The switch from a nutrient-rich to a nutrient-depleted solution  
174 inhibits biofilm growth reproducibly without changing any environmental conditions such as flow  
175 speed, temperature, and salinity. Therefore, we can unambiguously identify biofilm growth as the  
176 key driving force for the formation of a channel network.

177 The structural analysis of the channels as well as identifying biofilm growth as the driving force  
178 controlling channel formation lead us to the conclusion that a buckling-delamination process  
179 governs channel formation. This process was recently qualitatively described by **Velankar et al.**  
180 (**2012**) for a thin elastic film loosely bound to a stiff substrate and can be applied to the formation  
181 of a biofilm as schematically depicted in **Figure 3b**. In an initial stage, **Figure 3b-I**, the surface is  
182 populated by bacteria that grow and form a biofilm. The growth of the biofilm within the constrained  
183 space of a microfluidic channel results in compressive stresses  $\sigma$  which are presumed to be uniform  
184 and equi-biaxial (**Figure 3b-II**). The biofilm is assumed to have isotropic mechanical properties with  
185 Young's modulus  $E_f$ , Poisson's ratio  $\nu_f$  and thickness  $h$ . We consider now a circular, delaminated  
186 blister with radius  $R$ , where the adhesion between the film and the substrate is minimal (**Figure 3b-**  
187 **III**). In the unbuckled state, the energy release rate of the interface crack is zero and the blister  
188 will not grow. Only when the film buckles away from the substrate, the crack driving force will be  
189 nonzero. The critical stress when the film buckles away from the substrate is given by **Hutchinson**  
190 **et al. (1992)** as

$$\sigma_c = 1.2235 \frac{E_f}{1 - \nu_f^2} \left( \frac{h}{R} \right)^2. \quad (1)$$

191 The biofilm will buckle away from the substrate for stresses induced by the growth in excess of  
192  $\sigma_c$ . For a buckled biofilm, the driving force for the interface crack propagation is nonzero and,  
193 consequently, the energy release rate  $G$  and the interface toughness  $\Gamma(\psi)$  determine if the blister  
194 grows or if it stays sub-critical.

195 The elastic energy per unit area stored in the unbuckled film is  $G_0 = (1 - \nu_f)h\sigma^2/E_f$  and the ratio  
196  $G/G_0$  depends only on  $\sigma/\sigma_c$  and  $\nu_f$  and can be expressed as

$$\frac{G}{G_0} = c_2 \left[ 1 - \left( \frac{\sigma_c}{\sigma} \right)^2 \right] \quad (2)$$

197 where  $c_2 = [1 + 0.9021(1 - \nu_f)]^{-1}$ . So  $G$  increases monotonically with  $\sigma/\sigma_c$ , approaching  $G_0$ . Therefore  
198 the energy release rate  $G$  and hence the driving force for crack propagation increases with an  
199 increase in the growth induced stress  $\sigma$ . This means, that sufficiently high  $\sigma$  is needed to initiate  
200 and drive the buckling-delamination process.

201 However, once buckled, the criterion for the initial advance of the delaminated blister is also  
202 dependent on the interface toughness  $\Gamma(\psi)$

$$G = \Gamma(\psi). \quad (3)$$

203 As a consequence, the adhesion between the biofilm and the substrate plays an important role in  
204 the growth of the blister, as the interface crack will not grow with  $G < \Gamma(\psi)$ .

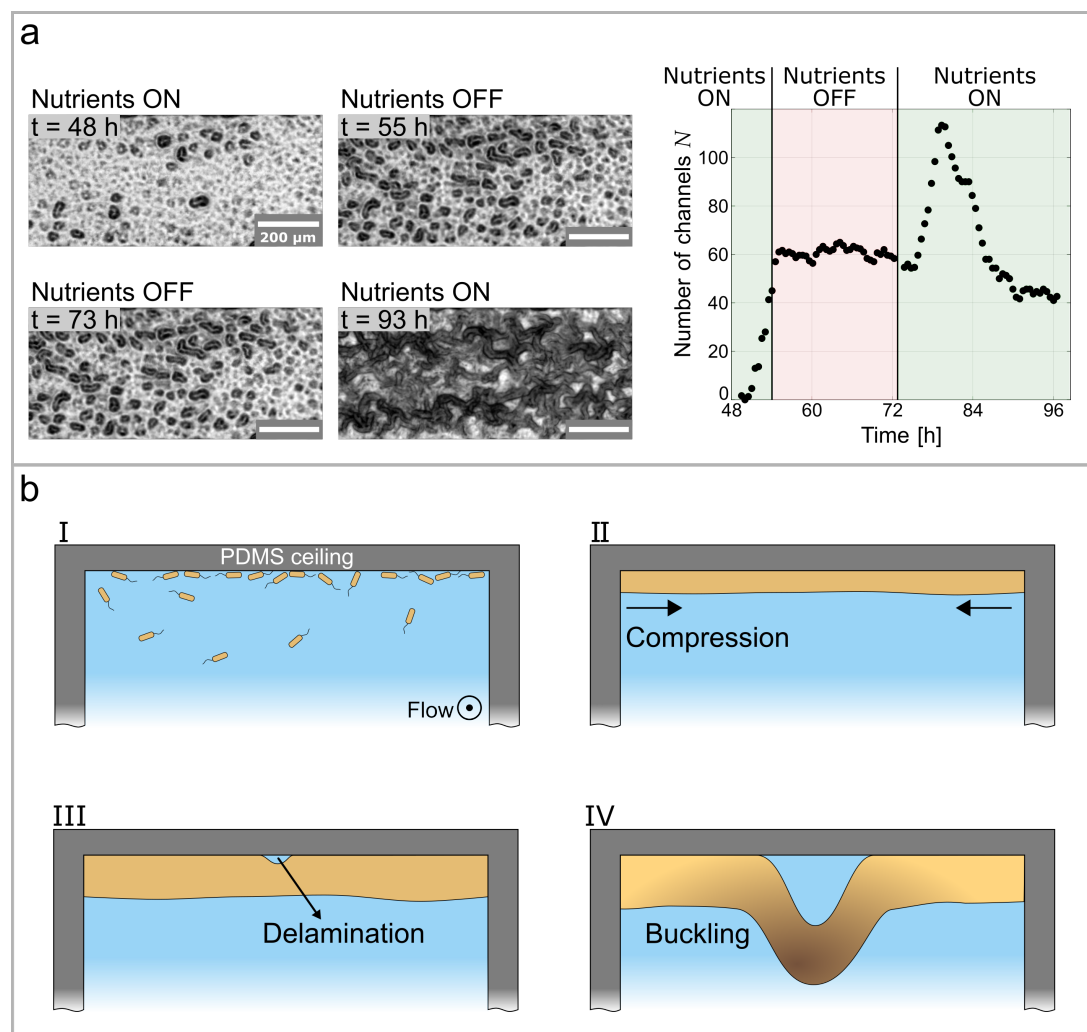

**Figure 3.** Growth controls the formation of channels through buckling-delamination. **(a)** Phase-contrast images following an experimental protocol to investigate the role of biofilm growth. At *t* = 55 h the nutrient solution is replaced with a nutrient depleted salt solution to stop growth. At *t* = 73 h the salt solution is replaced with the original nutrient solution. The graph shows the number of channels, *N*, as a function of time and nutrient availability. **(b)** Schematic representation of the buckling-delamination mechanism during channel formation in *P. aeruginosa* biofilm in a microfluidic device.

205 To summarize, the initial buckling of the biofilm is determined by the mechanical properties  
 206 of the biofilm itself and the compressive stress  $\sigma$  generated by the growth of the biofilm confined  
 207 between two walls. However, the growth can simply be isotropic, in contrast to biofilms on agar,  
 208 where complex differences in growth rate are required to induce compressive stresses. The  
 209 subsequent growth of the delaminated channel is governed by the interplay of the energy release  
 210 rate  $G$  and the interface toughness  $\Gamma(\psi)$ . To this end, a sufficiently high compressive stress and a  
 211 low adhesion between the biofilm leads to buckling delamination with the formation of a connected  
 212 network of stable channels. The mechanism is quite simple and seems to rationalize the prevalence  
 213 of such wrinkled biofilms.

#### 214 **Biofilm adhesion controls channel formation**

215 Our results show that the adhesive strength between the biofilm and the substrate plays a crucial  
 216 role in buckling-delamination, leading to channel formation. By tuning the interaction between the  
 217 biofilm and the substrate, we are able to induce or impede delamination and channel formation

218 with unprecedented control and reproducibility. The adhesion between single bacteria and a  
219 substrate can be controlled by changing the surface free energy of the substrate, as bacteria  
220 preferably adhere to surfaces with a high surface free energy (Zhao *et al.*, 2005; Callow and Fletcher,  
221 1994). We increase the surface free energy of PDMS from  $\gamma = 23 \text{ mN m}^{-1}$  to  $\gamma = 37 \text{ mN m}^{-1}$  (more  
222 hydrophilic) through the addition of small amounts of a PEG-PDMS block-copolymer to the PDMS  
223 mixture, following Gökaltun *et al.* (2019). Two biofilms were grown on substrates with different  
224 surface free energies under otherwise identical conditions (Figure 4a). The biofilm grown on low  
225 surface free energy PDMS (left) undergoes clear buckling-delamination and develops a channel  
226 network. The biofilm grown on high surface free energy PDMS (right) does not undergo buckling-  
227 delamination and remains homogeneously adherent to the PDMS substrate. These results show  
228 that channel formation can be suppressed by increasing the surface free energy of the substrate  
229 and, consequently, the adhesion strength between the biofilm and the substrate. We vary the  
230 surface free energy of the substrate through chemical modifications (Figure 4) or through physical  
231 modifications with oxygen plasma treatment (Figure 4-Figure Supplement 1) with identical results.

232 In the next step, we monitor the overall thickness of the biofilm over time and find that it  
233 increases substantially as a channel network is formed compared to a biofilm where no channels  
234 are formed. We obtained the overall average thickness of the biofilm by fluorescently labeling  
235 the eDNA component of the biofilm matrix with propidium iodide and measuring the thickness in  
236 the z-direction with a confocal microscope. Figure 4b compares the average, overall thickness of  
237 a biofilm grown on a high surface free energy substrate to a biofilm grown on a low surface free  
238 energy substrate. After 30 to 48 hours the latter develops a channel network and its thickness  
239 increases substantially. The biofilm thickness increases further with time, until after 72 hours the  
240 biofilm has reached a total thickness of roughly  $90 \mu\text{m}$  and takes up almost the whole  $100 \mu\text{m}$ -high  
241 microfluidic channel. On the other hand, the biofilm grown on high surface energy PDMS does not  
242 develop a channel network. The biofilm thickness increases continuously, but slower than in the  
243 case of a channel-forming biofilm. After 72 hours, the biofilm has a mean thickness of  $40 \mu\text{m}$ , which  
244 is less than half of the microfluidic channel height.

245 The relation between surface free energy and buckling-delamination allows us to control the  
246 biofilm morphology depending on the substrate's surface free energy. The biofilm morphology  
247 can locally be controlled by solely adjusting the surface free energy of the substrate with a spatial  
248 resolution in the millimeter range (Figure 4c). We produced a microfluidic channel that consists of  
249 alternating, millimeter-long sections made out of low and high surface free energy surfaces. The  
250 biofilm grown in this patterned PDMS channel exhibits a patterned morphology that mirrors the  
251 patterning of the surface free energy of the PDMS: the biofilm grown on the low surface free energy  
252 PDMS forms a channel network, while the one grown on the high surface free energy PDMS forms a  
253 flat biofilm, with nutrient conditions being evidently equal. Remarkably, the morphological change  
254 is as abrupt as the change in surface free energy. These experimental results show for the first  
255 time how basic material properties of the substrate, which moreover are easy to modulate, can  
256 be used to reliably control the biofilm morphology without changing growth conditions or biofilm  
257 composition or even enforce a patterned structure.

### 258 **Bacterial movement inside the channel network**

259 The channel network is devoid of any biofilm matrix and densely populated by actively motile  
260 bacteria, as shown by the movie of bacteria swimming in a channel Figure 5-video 1. The bacterial  
261 motion shows no preferential direction and high-speed images can be used to calculate a spatially  
262 resolved time-correlation coefficient (Secchi *et al.*, 2013). Bacterial motion leads to frequent local  
263 changes in the image intensity on a timescale related to the bacterial swimming speed (see Spatially  
264 resolved degree of correlation for details). Therefore, we calculate the time and space correlation  
265 of the intensity of the image over regions of interest located in the channel and use the degree  
266 of correlation as a representation for bacteria motility. By computing the degree of correlation of  
267 the image over time and retaining the spatial resolution, we can identify areas of higher and lower



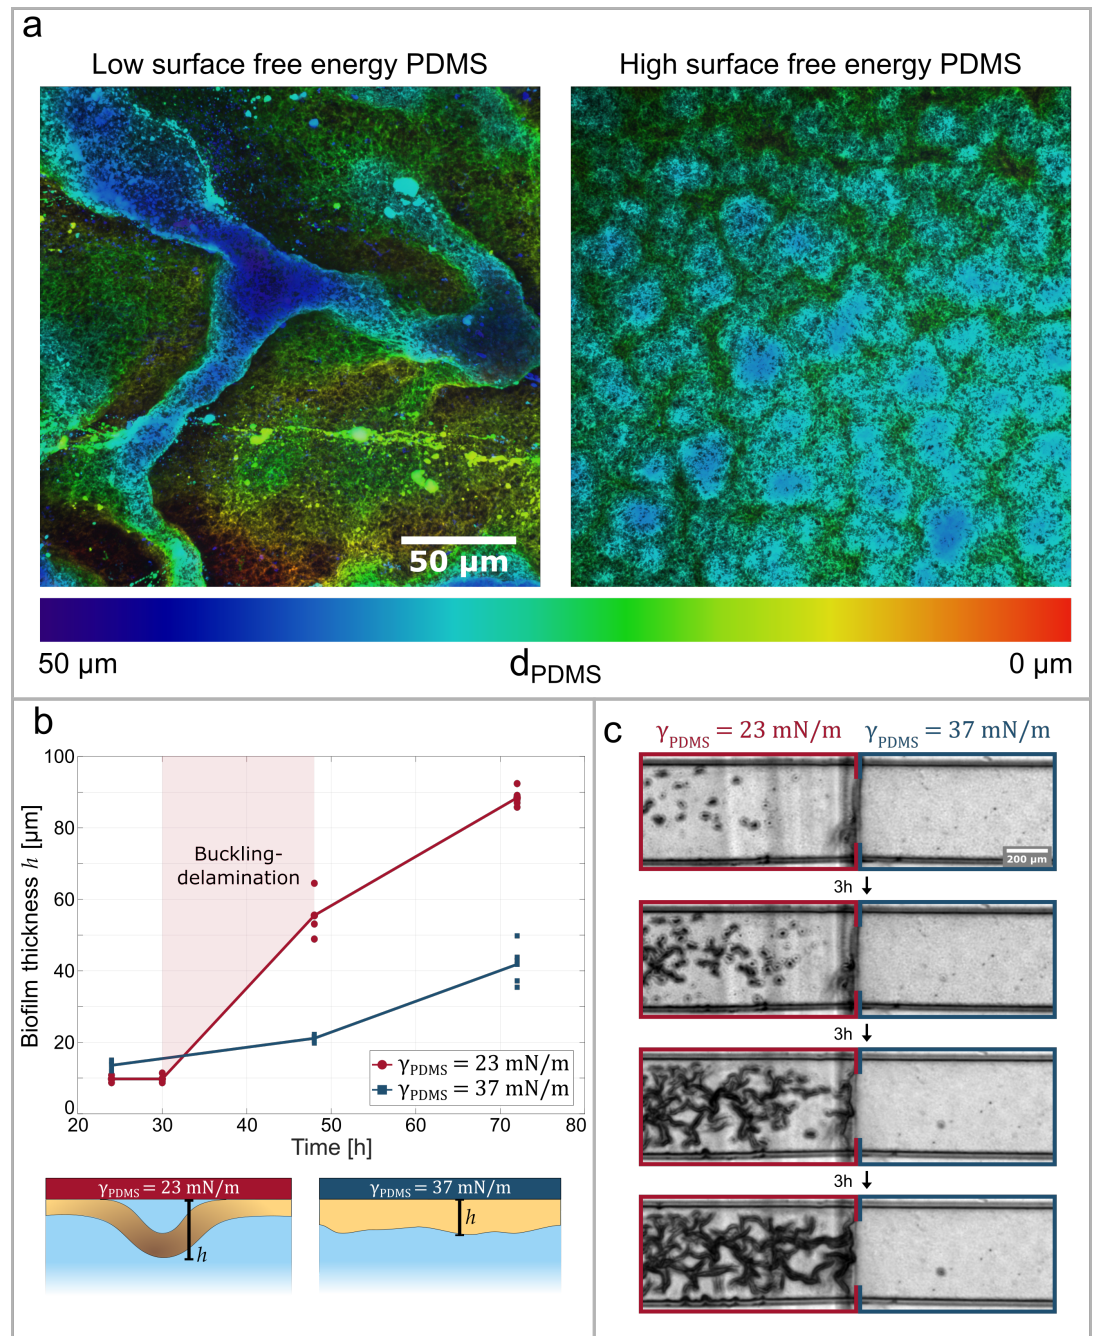

**Figure 4.** Adhesive strength between the biofilm and the substrate governs channel formation. **(a)** Reconstructions from laser-scanning confocal microscopy images of biofilm. The biofilms are either grown on a low surface free energy PDMS substrate (left,  $\gamma_{PDMS} = 23$  mN m<sup>-1</sup>) or on a high surface free energy PDMS substrate (right,  $\gamma_{PDMS} = 37$  mN m<sup>-1</sup>). **(b)** Biofilm thickness as a function of time and surface free energy. The average thickness of biofilm grown on a low surface free energy PDMS substrate (red) and on a high surface free energy PDMS substrate (blue). **(c)** The image sequence shows a biofilm that is grown on a patterned PDMS substrate in the same microfluidic channel. On the left, the substrate has a low surface free energy while on the right it has a high surface free energy.

**Figure 4-Figure supplement 1.** The surface free energy of the substrate can be changed through a physical process. The treatment of PDMS with an oxygen plasma increases the hydrophilicity with identical results as the chemical modification.



268 bacterial activity. Figure **Figure 5a** shows the activity maps and the corresponding brightfield images  
269 at different stages of the biofilm development. The first stage corresponds to a time of 72 hours  
270 after the start of the experiment and shows the biofilm, roughly one hour before it starts to form a  
271 channel network. The activity map shows a uniformly high degree of correlation and, therefore, no  
272 detectable bacteria movement. Nine hours later, the channel network is fully developed according  
273 to the brightfield micrograph and the activity map shows large, active areas with a low degree of  
274 correlation. It becomes clear that areas with detectable bacteria movement are highly localized and  
275 distinct from inactive areas. A comparison between the activity map and the biofilm microstructure  
276 as shown in the bright field micrographs reveals that the active areas are exclusively found inside  
277 the channels of the biofilm. These results indicate that the hollow channel network gets populated  
278 by motile bacteria as the channels form.

279 As the biofilm matures, the bacterial activity diminishes until it is not detectable anymore  
280 (**Figure 5a**, right panel), without any structural changes in the biofilm. Previous studies on biofilm  
281 dispersal have described a mode of dispersal known as seeding dispersal, where a large amount of  
282 single bacteria are released from hollow cavities that form inside the biofilm colony (**Kaplan, 2010**).  
283 In non-mucoid PAO1 biofilms these hollow cavities are filled with motile, planktonic cells before a  
284 breach in the biofilm wall releases the cells into the surrounding medium (**Purevdorj-Gage et al.,**  
285 **2005**). In our case, we observe that the channels get filled with planktonic cells. However, we do  
286 not observe any dispersal. The right panel in **Figure 5a** shows the same section of the biofilm two  
287 hours after the maximum movement inside the channels is detected. The activity map shows that  
288 the previously active areas have changed into areas with a high degree of correlation and hence no  
289 detectable bacterial activity. The corresponding phase-contrast image reveals that the decrease in  
290 bacterial motility comes without a dispersal event nor deformation or structural changes of the  
291 biofilm as a whole.

292 The swimming speed of the motile bacteria inside the channel network is not affected by  
293 the fluid flow surrounding the biofilm. Since previous studies suggested that channels in biofilm  
294 introduce flow to overcome diffusion-limited transport of nutrients (**Wilking et al., 2013**), we verified  
295 if the nutrient flow could induce advective transport inside the channel network. To this end, we  
296 performed differential dynamic microscopy (DDM) to extract the average bacterial swimming speed  
297 of the bacteria inside the channels (**Bayles et al., 2016; Wilson et al., 2011**). The average bacterial  
298 swimming speed was measured as a function of the mean flow rates of the nutrient solution  
299 surrounding the biofilm. The results in **Figure 5c** show no clear dependency of the average bacterial  
300 swimming speed inside the channels from the flow speed of the nutrient solution, despite the  
301 flow rate of nutrients varying from  $0 \text{ mm s}^{-1}$  to  $11.1 \text{ mm s}^{-1}$  and being three orders of magnitude  
302 larger than the bacterial swimming speed. In addition, the average value of the swimming speed  
303 ( $20$  to  $30 \mu\text{m s}^{-1}$ ) corresponds to values previously reported in literature for *P. aeruginosa* PAO1 in  
304 suspension (**Khong et al., 2021**). These findings indicate that the bulk flow surrounding the biofilm  
305 does not introduce advection inside the biofilm and therefore the channels consist of a closed  
306 biofilm matrix layer populated by motile bacteria.

## 307 Discussion and Conclusions

308 We reported for the first time the structural evolution of biofilm grown on a solid substrate exposed  
309 to fluid flow in a microfluidic device. A buckling-delamination process governs the formation  
310 of three-dimensional hollow channels. Experimentally we show that the biofilm morphology is  
311 determined by the isotropic growth of the biofilm in a confined space and the adhesion between  
312 the biofilm and the solid substrate. These findings give unprecedented control over the biofilm  
313 morphology through basic physical parameters such as adhesive strength to the substrate and  
314 nutrient concentration.

315 Our results show that biofilm growth is the key driving force for buckling-delamination that  
316 leads to the formation of channels. The continuous growth of a biofilm in a confined space induces

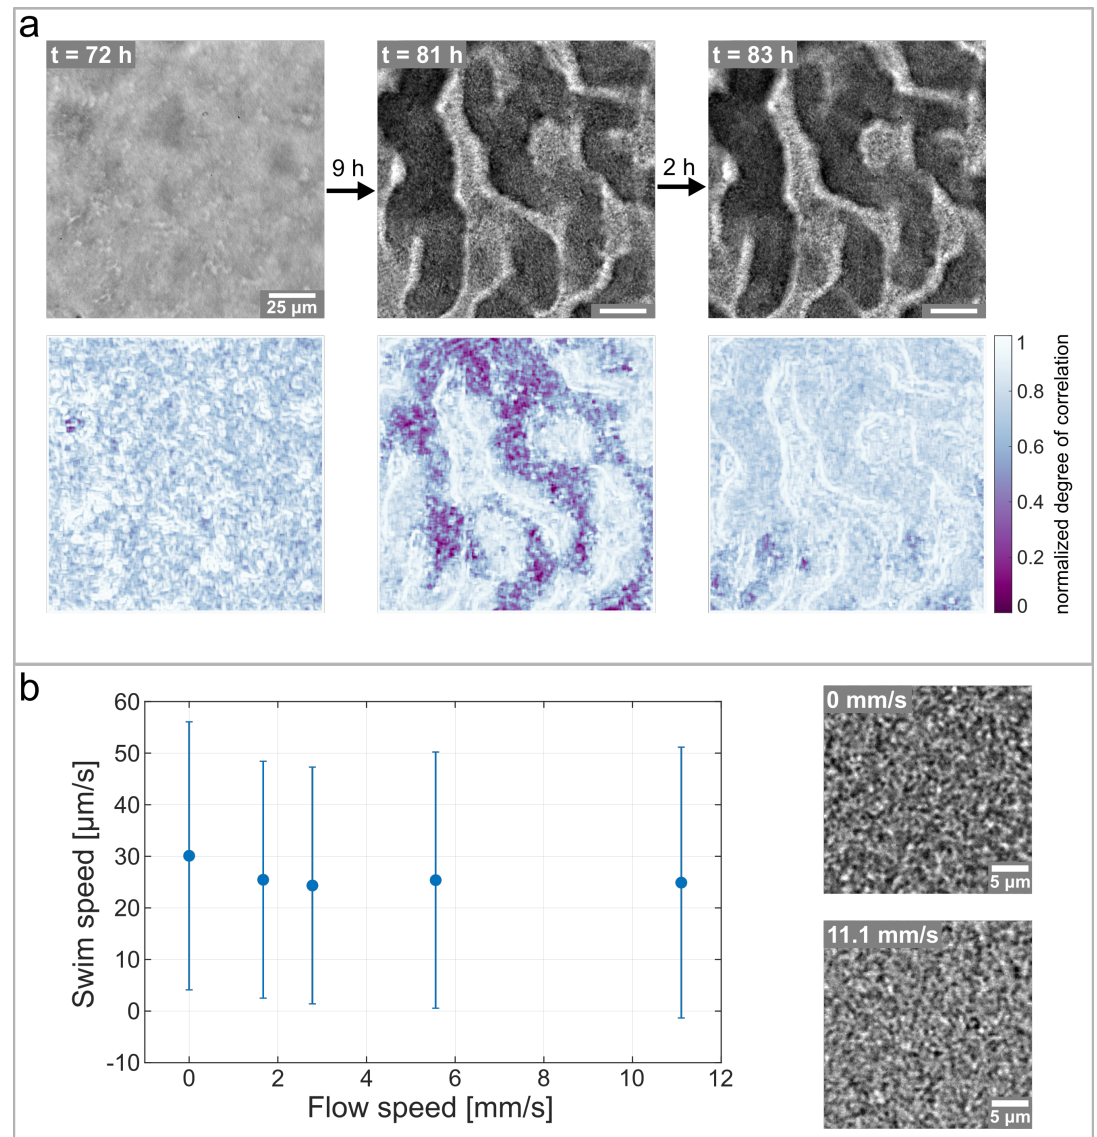

**Figure 5.** Hollow channels are populated by motile bacteria. **(a)** Bacterial movement inside the channel network visualized using a spatially resolved, normalized degree of correlation. A low degree of correlation corresponds to an active region. The brightfield images show the corresponding structure of the biofilm. **(b)** The Differential dynamic microscopy is used to quantify the bacterial swimming speed inside the biofilm channels. The swimming speed is measured at varying fluid flow speeds inside the microfluidic device. The two microscopy images show a close up of the bacterial biofilm at two different fluid flow speeds. The videos of the bacteria motion can be found in [Figure 5-video 2](#) and [Figure 5-video 3](#).

**Figure 5-video 1.** Video of the bacterial movement inside the biofilm channels.

**Figure 5-video 2.** Video of bacteria movement with no surrounding fluid flow.

**Figure 5-video 3.** Video of bacteria movement with a surrounding fluid flow speed of  $11.1 \text{ mm s}^{-1}$

317 compressive stresses that initiate buckling of the biofilm. Previous studies have identified growth-  
318 induced compressive stresses to play a role in wrinkling of biofilm grown on agar plates (*Asally*  
319 *et al.*, 2012; *Yan et al.*, 2019; *Ben Amar and Wu*, 2014; *Espeso et al.*, 2015; *Fei et al.*, 2020). In these  
320 systems, the diffusion-limited transport of nutrients exclusively from the bottom of the biofilm can  
321 lead to gradients in growth rate. In combination with weak adhesion to the agar, the differences  
322 in growth rate induce compressive stresses that initiate wrinkling. In our case, the introduction of  
323 moderate fluid flow increases nutrient flux at the surface of the biofilm and therefore minimizes  
324 nutrient gradients in the bulk of thin biofilms (*Krsmanovic et al.*, 2021). Therefore, we can assume  
325 a uniform biofilm in x-y direction and minimal growth gradients in the z-direction. These findings  
326 also show that in the simple system of confined growth of a uniform biofilm compressive stresses  
327 are high enough to induce buckling and channel formation.

328 This work emphasizes the importance of mechanical instabilities in biofilm wrinkling and elu-  
329 cidates the dependence of the channel formation process on the adhesive strength between the  
330 biofilm and the solid substrate. In our system, the biofilm delaminates and buckles away from the  
331 substrate to form a channel network. Previous studies found that wrinkled biofilms often exhibit a  
332 layered structure where the top layer wrinkles and the bottom layer stays bonded to the agar plate  
333 (*Yan et al.*, 2019; *Zhang et al.*, 2017, 2016a). However, we observe biofilm delamination directly  
334 from the substrate without any intermediate layer. This further confirms that our experimental  
335 setup leads to the formation of homogeneous, non-layered biofilms. Additionally, we showed ex-  
336 perimentally that an increase in adhesive strength between the biofilm and the substrate impedes  
337 channel formation, as the biofilm can no longer delaminate. This understanding gives us full control  
338 over biofilm morphology: we patterned and predicted the biofilm structure based on the surface  
339 free energy of the PDMS substrate.

340 Many recent studies focused on static biofilm-agar systems to describe and understand the  
341 mechanical contributions to the structural evolution of biofilms. However, nutrient gradients,  
342 spreading and swarming of colonies, or the mechanical response of the substrate complicate the  
343 analysis and may convolute the purely mechanical contributions with biological responses of the  
344 microorganisms. We show that, within well-defined microfluidic systems, it is possible to isolate  
345 the mechanical contributions from the biofilm structure and control them without changing any  
346 biological parameter. Furthermore, we hypothesize that our findings are general and applicable to  
347 other bacterial species as our growth conditions - fluid flow and the presence of solid substrates -  
348 are often found in the biofilms habitats. This might open up new strategies for biofilm control and  
349 contribute to a more holistic view of biofilm formation and evolution.

## 350 **Methods and Materials**

### 351 **Culture conditions and growth in the microfluidic device**

352 *Pseudomonas aeruginosa*, PAO1 WT, was grown in tryptone broth (10 g l<sup>-1</sup> Tryptone, microbiologically  
353 tested, Sigma Aldrich, 5 g l<sup>-1</sup> NaCl) in an orbital shaker overnight at 37 °C. The overnight culture was  
354 then diluted 1:100 in tryptone broth (TB) and grown for 2 hours until OD<sub>600</sub> reached the value of 0.2.  
355 The bacterial suspension was then diluted 1:10 and used to inoculate the microfluidic channel.

356 The microfluidic channel was inoculated by withdrawing 600 µl of bacterial suspension from  
357 a 2 mL Eppendorf tube. The bacteria were left undisturbed for 1 hour before fresh media was  
358 flown using the syringe pump. For all microfluidic experiments, a diluted 1:10 tryptone broth (1 g l<sup>-1</sup>  
359 Tryptone, 5 g l<sup>-1</sup> NaCl) was used as the growth medium and the temperature was kept constant at  
360 25 °C.

### 361 **Microfluidic device**

362 Rectangular microfluidic channels were fabricated using standard soft lithography techniques (*Xia*  
363 *and Whitesides (1998)*). Microchannel molds were prepared by depositing SU-8 2150 (MicroChem  
364 Corp., Newton, MA) on silicon wafers via photolithography. Next, polydimethylsiloxane (PDMS;

365 Sylgard 184 Silicone Elastomer Kit, Dow Corning, Midland, MI) was prepared and cast on the molds.  
366 After curing for 24 hours at 80 °C, PDMS microchannels were plasma-sealed onto a clean glass slide.  
367 The PDMS channels were flushed with 2 ml of fresh media before each experiment. Flow was driven  
368 by a syringe pump (Standard PHD Ultra syringe pump, Harvard Apparatus), and the flow rate was  
369 held constant at 1.7 mm s<sup>-1</sup> during the experiment.

370 Hydrophilic PDMS with 0.5% dimethylsiloxan-ethyleneoxide blockcopolymer (DBE-712, Gelest,  
371 Morrisville, PA) was produced according to *Gökaltun et al. (2019)*. Casting and plasma bonding  
372 were carried out as described above. The patterned microfluidic channel was produced by first  
373 casting hydrophobic PDMS onto the molds and curing the PDMS as described above. Then, without  
374 removing the PDMS from the mold, small, millimeter long sections were cut out with a precision  
375 knife. The removed sections were filled with hydrophilic PDMS. The patterned channels were cured  
376 and bonded to a glass slide as described above.

### 377 **Staining procedures**

378 Staining with a propidium iodide solution was performed to measure the thickness of the biofilm.  
379 We produced the staining solution by mixing propidium iodide (Sigma Aldrich) with the nutrient  
380 medium to a final concentration of 5 µM and flowed the solution for the entire duration of the  
381 experiment. For the visualization of the three-dimensional structure, GFP-labelled Concanavalin A  
382 (Sigma Aldrich) was used. The stain was dissolved in the nutrient solution to a final concentration of  
383 100 µg l<sup>-1</sup>. The biofilm was incubated for 20 minutes with the staining solution before being washed  
384 with a fresh nutrient solution.

### 385 **Visualization**

386 Light microscopy images were taken on Nikon Eclipse Ti2-A in phase contrast configuration,  
387 equipped with a Hamamatsu ImageEM-X2 CCD camera and a 20x objective. For timelapse images,  
388 we used the microscope control software µManager (*Stuurman et al., 2007*) and acquired an image  
389 every 5 minutes. The phase contrast images were analysed with the software Fiji (*Schindelin et al.,*  
390 *2012*). Fiji was also used to produce the three-dimensional renderings of the biofilm from the  
391 confocal images using the temporal color code function. For the fluorescent visualizations, we used  
392 a Nikon Eclipse T1 inverted microscope coupled with a Yokogawa CSU-W1-T2 confocal scanner unit  
393 and equipped with an Andor iXon Ultra EMCCD camera. The images were acquired with a 60x water  
394 immersion objective with N.A. of 1.20. We used Imaris (Bitplane) for analysing and producing cross  
395 sections of the z-stacks.

### 396 **Skeletonization of channel networks**

397 The quantitative analysis of the channel network formation was performed using Fiji and Matlab  
398 (version 9.7.0 (R2019b). Natick, Massachusetts: The MathWorks Inc, 2019). In a first step, the  
399 brightfield timelapse images were binarized with Fiji. Otsu's method (*Otsu, 1979*) was used to  
400 determine the thresholding value of the last image of the timelapse and this thresholding value  
401 was used to binarize all images. Next, the binarized images were imported into Matlab and objects  
402 smaller than 5 pixels were removed and a morphological opening operation was performed with  
403 Matlab's own function *bwareaopen* before the resulting images were skeletonized using Matlab  
404 skeletonization command *bwskel*. The Matlab function *bwlabel* was used to label all connected  
405 components of the skeletonized image and extract the longest connected path and the total number  
406 of wrinkles.

### 407 **Differential Dynamic Microscopy**

408 Images were acquired at 2000 frames per second with the Fastcam UX100 (Photron, Japan) high-  
409 speed camera on the Nikon Eclipse Ti2-A microscope in brightfield mode. Differential Dynamic  
410 Microscopy (DDM) was performed according to *Cerbino and Trappe (2008)* using a custom code

411 written in Matlab. Subsequent fitting and swimming speed extraction was performed as described  
412 by *Wilson et al. (2011)*.

### 413 **Spatially resolved degree of correlation**

414 Images were acquired at 1000 frames per second with the Fastcam UX100 (Photron, Japan) high-  
415 speed camera on the Nikon Eclipse Ti2-A microscope in brightfield mode. The spatially resolved  
416 correlation coefficient  $c_I(\tau; t, r)$  between two images taken at times  $t$  and  $t + \tau$  was calculated  
417 according to (*Secchi et al., 2013*)

$$c_I(\tau; t, r) = \frac{\langle I_p(t)I_p(t + \tau) \rangle_r}{\langle I_p(t) \rangle_r \langle I_p(t + \tau) \rangle_r} - 1. \quad (4)$$

418  $I_p$  is the image intensity measured by the  $p^{\text{th}}$  pixel and  $\langle \dots \rangle_r$  denotes an average over all pixels  
419 within a region of interest centered around  $r$ . The images were subdivided into regions of interest  
420 of  $2.5 \times 2.5 \mu\text{m}$ . The degree of space-time correlation was calculated between two images which  
421 were 1 s apart and averaged over the regions of interest. This correlation coefficient was calculated  
422 for 200 different images, with the same timestep and averaged.

### 423 **Data Availability**

424 The raw data of the graphs in Figures 1, 3, 4 and 5 are made available through a Data Dryad  
425 repository as timelapse and high-speed images. The Matlab Code for Skeletonization (Figure 1),  
426 DDM and Correlation calculations (Figure 5) are available in the same repository. The repository is  
427 found under doi:10.5061/dryad.vq83bk3tn.

### 428 **Acknowledgments**

429 The authors acknowledge Matteo Brizzioli, Giovanni Savorana and Dr. Alexandra Bayles for their  
430 contributions to the DDM code and analysis; Dr. Kirill Feldman and Ela Burmeister for their valuable  
431 experimental support and the ScopeM facility at ETH Zurich for providing excellent equipment and  
432 support. E. S. acknowledges support from SNSF PRIMA grant 179834.

### 433 **References**

- 434 **Asally M**, Kittisopikul M, Rue P, Du Y, Hu Z, Gagatay T, Robinson AB, Lu H, Garcia-Ojalvo J, Suel GM. Localized  
435 cell death focuses mechanical forces during 3D patterning in a biofilm. *PNAS*. 2012; 109(46):18891–18896.  
436 <http://www.pnas.org/cgi/doi/10.1073/pnas.1212429109>, doi: [10.1002/cbf.290080303](https://doi.org/10.1002/cbf.290080303).
- 437 **Badal D**, Jayarani AV, Kollaran MA, Kumar A, Singh V. *Pseudomonas aeruginosa* biofilm formation on endotracheal  
438 tubes requires multiple two-component systems. *Journal of Medical Microbiology*. 2020; 69(6):906–919. doi:  
439 [10.1099/jmm.0.001199](https://doi.org/10.1099/jmm.0.001199).
- 440 **Bayles AV**, Squires TM, Helgeson ME. Dark-field differential dynamic microscopy. *Soft Matter*. 2016; 12(8):2440–  
441 2452. doi: [10.1039/c5sm02576a](https://doi.org/10.1039/c5sm02576a).
- 442 **Ben Amar M**, Wu M. Patterns in biofilms: From contour undulations to fold focussing. *Epl*. 2014; 108(3). doi:  
443 [10.1209/0295-5075/108/38003](https://doi.org/10.1209/0295-5075/108/38003).
- 444 **Bixler GD**, Bhushan B. Review article: Biofouling: Lessons from nature. *Philosophical Transactions of*  
445 *the Royal Society A: Mathematical, Physical and Engineering Sciences*. 2012; 370(1967):2381–2417. doi:  
446 [10.1098/rsta.2011.0502](https://doi.org/10.1098/rsta.2011.0502).
- 447 **Callow ME**, Fletcher RL. The influence of low surface energy materials on bioadhesion - a review. *International*  
448 *Biodeterioration and Biodegradation*. 1994; 34(3-4):333–348. doi: [10.1016/0964-8305\(94\)90092-2](https://doi.org/10.1016/0964-8305(94)90092-2).
- 449 **Cerbino R**, Trappe V. Differential dynamic microscopy: Probing wave vector dependent dynamics with a  
450 microscope. *Physical Review Letters*. 2008; 100(18):1–4. doi: [10.1103/PhysRevLett.100.188102](https://doi.org/10.1103/PhysRevLett.100.188102).
- 451 **Chung JY**, Nolte AJ, Stafford CM. Surface wrinkling: A versatile platform for measuring thin-film properties.  
452 *Advanced Materials*. 2011; 23(3):349–368. doi: [10.1002/adma.201001759](https://doi.org/10.1002/adma.201001759).



- 453 **Conrad JC**, Poling-Skutvik R. Confined flow: Consequences and implications for bacteria and biofilms. Annual  
454 Review of Chemical and Biomolecular Engineering. 2018; 9:175–200. doi: 10.1146/annurev-chembioeng-  
455 060817-084006.
- 456 **Cont A**, Rossy T, Al-Mayyah Z, Persat A. Biofilms deform soft surfaces and disrupt epithelia. eLife. 2020; p. 1–22.  
457 doi: [10.1101/2020.01.29.923060](https://doi.org/10.1101/2020.01.29.923060).
- 458 **Costerton JW**, Chenk KJ, Geesey GG, Ladd IT, Nickel CJ, Dasgupta M, Marrie TJ. Bacterial biofilms in nature and  
459 disease. Ann Rev Microbiol. 1987; 41:435–464. doi: [10.1146/annurev.mi.41.100187.002251](https://doi.org/10.1146/annurev.mi.41.100187.002251).
- 460 **Epstein AK**, Pokroy B, Seminara A, Aizenberg J. Bacterial biofilm shows persistent resistance to liquid wetting  
461 and gas penetration. Proceedings of the National Academy of Sciences of the United States of America. 2011;  
462 108(3):995–1000. doi: [10.1073/pnas.1011033108](https://doi.org/10.1073/pnas.1011033108).
- 463 **Espeso DR**, Carpio A, Einarsson B. Differential growth of wrinkled biofilms. Physical Review E - Statistical,  
464 Nonlinear, and Soft Matter Physics. 2015; 91(2):1–17. doi: [10.1103/PhysRevE.91.022710](https://doi.org/10.1103/PhysRevE.91.022710).
- 465 **Fauvart M**, Phillips P, Bachaspatimayum D, Verstraeten N, Fransaeer J, Michiels J, Vermant J. Surface tension  
466 gradient control of bacterial swarming in colonies of *Pseudomonas aeruginosa*. Soft Matter. 2012; 8(1):70–76.  
467 doi: [10.1039/c1sm06002c](https://doi.org/10.1039/c1sm06002c).
- 468 **Fei C**, Mao S, Yan J, Alert R, Stone HA, Bassler BL, Wingreen NS, Košmrlj A. Nonuniform growth and surface  
469 friction determine bacterial biofilm morphology on soft substrates. Proceedings of the National Academy of  
470 Sciences of the United States of America. 2020; 117(14):7622–7632. doi: [10.1073/pnas.1919607117](https://doi.org/10.1073/pnas.1919607117).
- 471 **Flemming HC**, Wingender J. The biofilm matrix. Nature Reviews Microbiology. 2010; 8:623–633. [http://dx.doi.](http://dx.doi.org/10.1038/nrmicro2415)  
472 [org/10.1038/nrmicro2415](http://dx.doi.org/10.1038/nrmicro2415), doi: 10.1038/nrmicro2415.
- 473 **Flemming HC**, Wingender J, Szewzyk U, Steinberg P, Rice SA, Kjelleberg S. Biofilms: An emergent form of  
474 bacterial life. Nature Reviews Microbiology. 2016; 14(9):563–575. doi: [10.1038/nrmicro.2016.94](https://doi.org/10.1038/nrmicro.2016.94).
- 475 **Flemming HC**, Wuertz S. Bacteria and archaea on Earth and their abundance in biofilms. Nature Reviews  
476 Microbiology. 2019; 17(4):247–260. <http://dx.doi.org/10.1038/s41579-019-0158-9>, doi: 10.1038/s41579-019-  
477 0158-9.
- 478 **Frolund B**, Palmgren R, Keiding K, Nielsen PH. Extraction of Extracellular Polymers from Activated Sludge using  
479 a Cation Exchange Resin. Wat Res. 1996; 30(8):1749–1758.
- 480 **Ghosh T**, Ngo TD, Kumar A, Ayranci C, Tang T. Cleaning carbohydrate impurities from lignin using: *Pseudomonas*  
481 *fluorescens*. Green Chemistry. 2019; 21(7):1648–1659. doi: [10.1039/c8gc03341b](https://doi.org/10.1039/c8gc03341b).
- 482 **Gingichashvili S**, Feuerstein O, Steinberg D. Topography and expansion patterns at the biofilm-agar interface  
483 in *bacillus subtilis* biofilms. Microorganisms. 2021; 9(1):1–14. doi: [10.3390/microorganisms9010084](https://doi.org/10.3390/microorganisms9010084).
- 484 **Gökaltun A**, Kang YBA, Yarmush ML, Usta OB, Asatekin A. Simple Surface Modification of Poly(dimethylsiloxane)  
485 via Surface Segregating Smart Polymers for Biomicrofluidics. Scientific Reports. 2019; 9(1):1–14. doi:  
486 [10.1038/s41598-019-43625-5](https://doi.org/10.1038/s41598-019-43625-5).
- 487 **Hall-Stoodley L**, Costerton JW, Stoodley P. Bacterial biofilms: From the natural environment to infectious  
488 diseases. Nature Reviews Microbiology. 2004; 2(2):95–108. doi: [10.1038/nrmicro821](https://doi.org/10.1038/nrmicro821).
- 489 **Hutchinson JW**, Thouless MD, Liniger EG. Growth and configurational stability of circular, buckling-driven film  
490 delaminations. Acta Metallurgica Et Materialia. 1992; 40(2):295–308. doi: [10.1016/0956-7151\(92\)90304-W](https://doi.org/10.1016/0956-7151(92)90304-W).
- 491 **Kaplan JB**. Biofilm Dispersal: Mechanisms, Clinical Implications, and Potential Therapeutic Uses. Journal of  
492 Dental Research. 2010; 89(3):205–218. doi: [10.1177/0022034509359403](https://doi.org/10.1177/0022034509359403).
- 493 **Kempes CP**, Okegbe C, Mears-Clarke Z, Follows MJ, Dietrich LEP. Morphological optimization for access to dual  
494 oxidants in biofilms. Proceedings of the National Academy of Sciences of the United States of America. 2014;  
495 111(1):208–213. doi: [10.1073/pnas.1315521110](https://doi.org/10.1073/pnas.1315521110).
- 496 **Khong NZJ**, Zeng Y, Lai SK, Koh CG, Liang ZX, Chiam KH, Li HY. Dynamic swimming pattern of *Pseudomonas*  
497 *aeruginosa* near a vertical wall during initial attachment stages of biofilm formation. Scientific Reports. 2021;  
498 11(1):1–11. <https://doi.org/10.1038/s41598-021-81621-w>, doi: [10.1038/s41598-021-81621-w](https://doi.org/10.1038/s41598-021-81621-w).
- 499 **Kim B**, Peterson ETK, Papautsky I. Long-term stability of plasma oxidized PDMS surfaces. Annual International  
500 Conference of the IEEE Engineering in Medicine and Biology - Proceedings. 2004; 26 VII:5013–5016. doi:  
501 [10.1109/iembs.2004.1404385](https://doi.org/10.1109/iembs.2004.1404385).

- 502 **Krsmanovic M**, Biswas D, Ali H, Kumar A, Ghosh R, Dickerson AK. Hydrodynamics and surface prop-  
503 erties influence biofilm proliferation. *Advances in Colloid and Interface Science*. 2021; 288. doi:  
504 [10.1016/j.cis.2020.102336](https://doi.org/10.1016/j.cis.2020.102336).
- 505 **Kücken M**, Newell AC. A model for fingerprint formation. *Europhysics Letters*. 2004; 68(1):141–146. doi:  
506 [10.1209/epl/i2004-10161-2](https://doi.org/10.1209/epl/i2004-10161-2).
- 507 **Lasa I**. Towards the identification of the common features of bacterial biofilm development. *International*  
508 *Microbiology*. 2006; 9(1):21–28.
- 509 **Liang H**, Mahadevana L. Growth, geometry, and mechanics of a blooming lily. *Proceedings of*  
510 *the National Academy of Sciences of the United States of America*. 2011; 108(14):5516–5521. doi:  
511 [10.1073/pnas.1007808108](https://doi.org/10.1073/pnas.1007808108).
- 512 **Madsen JS**, Lin YC, Squyres GR, Price-Whelan A, Torio AdS, Song A, Cornell WC, Sørensen SJ, Xavier JB, Dietrich  
513 LEP. Facultative control of matrix production optimizes competitive fitness in *Pseudomonas aeruginosa* PA14  
514 biofilm models. *Applied and Environmental Microbiology*. 2015; 81(24):8414–8426. doi: [10.1128/AEM.02628-](https://doi.org/10.1128/AEM.02628-15)  
515 [15](https://doi.org/10.1128/AEM.02628-15).
- 516 **Nadell CD**, Ricaurte D, Yan J, Drescher K, Bassler BL. Flow environment and matrix structure interact to determine  
517 spatial competition in *Pseudomonas aeruginosa* biofilms. *eLife*. 2017; 6:1–13. doi: [10.7554/eLife.21855](https://doi.org/10.7554/eLife.21855).
- 518 **Okegbe C**, Price-Whelan A, Dietrich LEP. Redox-driven regulation of microbial community morphogene-  
519 sis. *Current Opinion in Microbiology*. 2014; 18(1):39–45. <http://dx.doi.org/10.1016/j.mib.2014.01.006>, doi:  
520 [10.1016/j.mib.2014.01.006](https://doi.org/10.1016/j.mib.2014.01.006).
- 521 **Otsu N**. NOBUYUKI OTSU. - 1979 - A Threshold Selection Method from Gray-Level Histograms. *IEEE Transaction*  
522 *on Systems, Man and Cybernetics*. 1979; 9(1):62–66.
- 523 **Purevdorj B**, Costerton JW, Stoodley P. Influence of hydrodynamics and cell signaling on the structure and  
524 behavior of *Pseudomonas aeruginosa* biofilms. *Applied and Environmental Microbiology*. 2002; 68(9):4457–  
525 4464. doi: [10.1128/AEM.68.9.4457-4464.2002](https://doi.org/10.1128/AEM.68.9.4457-4464.2002).
- 526 **Purevdorj-Gage B**, Costerton WJ, Stoodley P. Phenotypic differentiation and seeding dispersal in non-  
527 mucoid and mucoid *Pseudomonas aeruginosa* biofilms. *Microbiology*. 2005; 151(5):1569–1576. doi:  
528 [10.1099/mic.0.27536-0](https://doi.org/10.1099/mic.0.27536-0).
- 529 **Rusconi R**, Lecuyer S, Autrusson N, Guglielmini L, Stone HA. Secondary flow as a mechanism for the formation of  
530 biofilm streamers. *Biophysical Journal*. 2011; 100(6):1392–1399. <http://dx.doi.org/10.1016/j.bpj.2011.01.065>,  
531 doi: [10.1016/j.bpj.2011.01.065](https://doi.org/10.1016/j.bpj.2011.01.065).
- 532 **Schindelin J**, Arganda-Carreras I, Frise E, Kaynig V, Longair M, Pietzsch T, Preibisch S, Rueden C, Saalfeld S,  
533 Schmid B, Tinevez JY, White DJ, Hartenstein V, Eliceiri K, Tomancak P, Cardona A. Fiji: An open-source platform  
534 for biological-image analysis. *Nature Methods*. 2012; 9(7):676–682. doi: [10.1038/nmeth.2019](https://doi.org/10.1038/nmeth.2019).
- 535 **Schultz MP**, Bendick JA, Holm ER, Hertel WM. Economic impact of biofouling on a naval surface ship. *Biofouling*.  
536 2011; 27(1):87–98. doi: [10.1080/08927014.2010.542809](https://doi.org/10.1080/08927014.2010.542809).
- 537 **Secchi E**, Roversi T, Buzzaccaro S, Piazza L, Piazza R. Biopolymer gels with "physical" cross-links: Gelation kinetics,  
538 aging, heterogeneous dynamics, and macroscopic mechanical properties. *Soft Matter*. 2013; 9(15):3931–3944.  
539 doi: [10.1039/c3sm27153f](https://doi.org/10.1039/c3sm27153f).
- 540 **Seminara A**, Angelini TE, Wilking JN, Vlamakis H, Ebrahim S, Kolter R, Weitz DA, Brenner MP. Osmotic  
541 spreading of *Bacillus subtilis* biofilms driven by an extracellular matrix. *Proceedings of the National*  
542 *Academy of Sciences*. 2012; 109(4):1116–1121. <http://www.pnas.org/cgi/doi/10.1073/pnas.1109261108>,  
543 doi: [10.1073/pnas.1109261108](https://doi.org/10.1073/pnas.1109261108).
- 544 **Stewart PS**. Diffusion in biofilms: Why is diffusion an important process? *Journal of Bacteriology*. 2003;  
545 185(5):1485–1491. doi: [10.1128/JB.185.5.1485](https://doi.org/10.1128/JB.185.5.1485).
- 546 **Stoodley P**, Dodds I, Boyle JD, Lappin-Scott HM. Influence of hydrodynamics and nutrients on biofilm struc-  
547 ture. *Journal of Applied Microbiology Symposium Supplement*. 1999; 85(28):19–28. doi: [10.1111/j.1365-](https://doi.org/10.1111/j.1365-2672.1998.tb05279.x)  
548 [2672.1998.tb05279.x](https://doi.org/10.1111/j.1365-2672.1998.tb05279.x).
- 549 **Stoodley P**, Lewandowski Z, Boyle JD, Lappin-Scott HM. The formation of migratory ripples in a mixed species bac-  
550 terial biofilm growing in turbulent flow. *Environmental microbiology*. 1999; 1(5):447–455. doi: [10.1046/j.1462-](https://doi.org/10.1046/j.1462-2920.1999.00055.x)  
551 [2920.1999.00055.x](https://doi.org/10.1046/j.1462-2920.1999.00055.x).

- 552 **Stuurman N**, Amdodaj N, Vale R.  $\mu$ Manager: Open Source Software for Light Microscope Imaging. *Microscopy*  
553 *Today*. 2007; 15(3):42–43. doi: 10.1017/s1551929500055541.
- 554 **Velankar SS**, Lai V, Vaia RA. Swelling-induced delamination causes folding of surface-tethered polymer gels.  
555 *ACS Applied Materials and Interfaces*. 2012; 4(1):24–29. doi: 10.1021/am201428m.
- 556 **Verstraeten N**, Braeken K, Debkumari B, Fauvart M, Fransaer J, Vermant J, Michiels J. Living on a surface: swarm-  
557 ing and biofilm formation. *Trends in Microbiology*. 2008; 16(10):496–506. doi: 10.1016/j.tim.2008.07.004.
- 558 **Wang Q**, Zhao X. A three-dimensional phase diagram of growth-induced surface instabilities. *Scientific Reports*.  
559 2015; 5(iv):1–10. doi: 10.1038/srep08887.
- 560 **Wilking JN**, Zaburdaev V, De Volder M, Losick R, Brenner MP, Weitz DA. Liquid transport facilitated by channels  
561 in *Bacillus subtilis* biofilms. *Proceedings of the National Academy of Sciences*. 2013; 110(3):848–852. <http://www.pnas.org/cgi/doi/10.1073/pnas.1216376110>, doi: 10.1073/pnas.1216376110.
- 562  
563 **Wilking JN**, Angelini TE, Seminara A, Brenner MP, Weitz DA. Biofilms as complex fluids. *MRS Bulletin*. 2011;  
564 36(5):385–391. doi: 10.1557/mrs.2011.71.
- 565 **Wilson LG**, Martinez VA, Schwarz-Linek J, Tailleur J, Bryant G, Pusey PN, Poon WCK. Differential dy-  
566 namic microscopy of bacterial motility. *Physical Review Letters*. 2011; 106(1):7–10. doi: 10.1103/Phys-  
567 *RevLett*.106.018101.
- 568 **Xia Y**, Whitesides GM. Soft Lithography. *Angew Chem Int Ed*. 1998; 37:550–575. doi: 10.1039/c1lc20189a.
- 569 **Yan J**, Fei C, Mao S, Moreau A, Wingreen NS, Košmrlj A, Stone HA, Bassler BL. Mechanical instability and  
570 interfacial energy drive biofilm morphogenesis. *eLife*. 2019; 8:1–28. doi: 10.7554/eLife.43920.
- 571 **Zhang C**, Li B, Huang X, Ni Y, Feng XQ. Morphomechanics of bacterial biofilms undergoing anisotropic differential  
572 growth. *Applied Physics Letters*. 2016; 109(14). <https://doi.org/10.1063/1.4963780>, doi: 10.1063/1.4963780.
- 573 **Zhang C**, Li B, Tang JY, Wang XL, Qin Z, Feng XQ. Experimental and theoretical studies on the morphogenesis of  
574 bacterial biofilms. *Soft Matter*. 2017; 13(40):7389–7397. doi: 10.1039/c7sm01593c.
- 575 **Zhang X**, Wang X, Nie K, Li M, Sun Q. Simulation of *Bacillus subtilis* biofilm growth on agar plate by diffusion-  
576 reaction based continuum model. *Physical Biology*. 2016; 13(4). doi: 10.1088/1478-3975/13/4/046002.
- 577 **Zhao Q**, Liu Y, Wang C, Wang S, Müller-Steinhagen H. Effect of surface free energy on the adhesion of biofouling  
578 and crystalline fouling. *Chemical Engineering Science*. 2005; 60(17):4858–4865. doi: 10.1016/j.ces.2005.04.006.

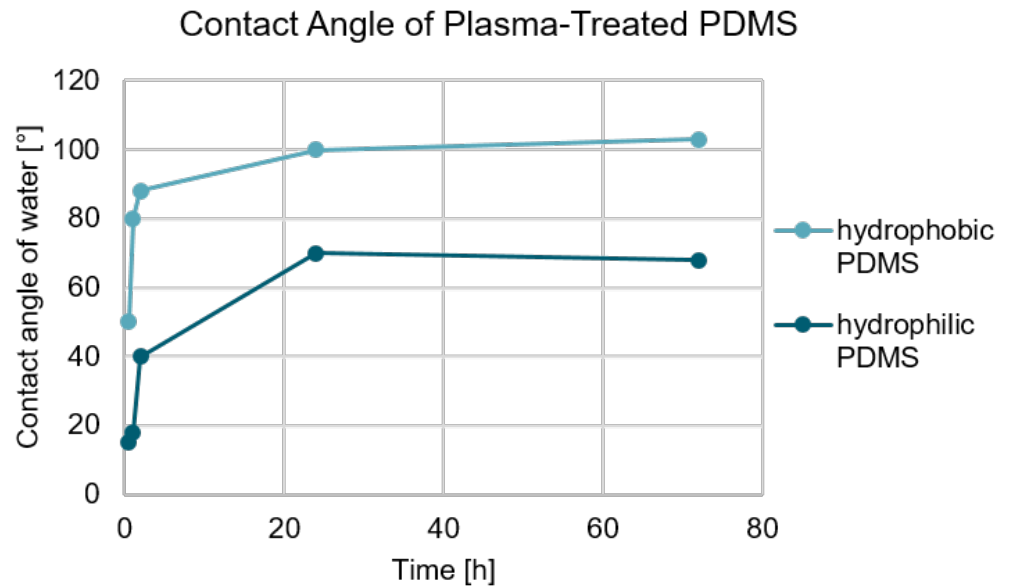

579

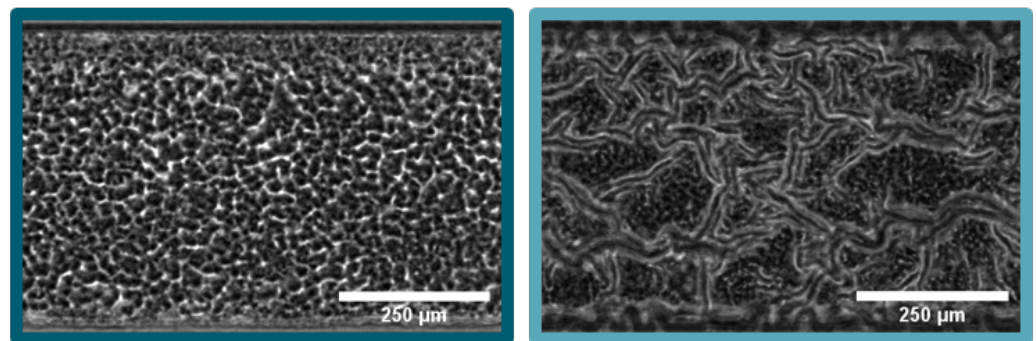

**Figure 4–Figure supplement 1.** Biofilm growth on hydrophilic and hydrophobic PDMS substrate. In both cases, the PDMS was treated with an oxygen plasma which renders the PDMS hydrophilic. As shown by *Kim et al. (2004)* the hydrophobic recovery of plasma treated can be varied depending on the storage conditions. Biofilm grown on the hydrophilic PDMS does not form a channel network, while the biofilm grown on the hydrophobic PDMS does form a channel network.
